# Supplementary material for: An Integrated “Multi-Omics” Comparison of Embryo and Endosperm Tissue-Specific Features and Their Impact on Rice Seed Quality
Source: Front Plant Sci. 2017 Nov 22;8:1984. doi: 10.3389/fpls.2017.01984 (PMC5702907; doi:10.3389/fpls.2017.01984)
Supplement: Supplementary file 11 [file DataSheet4.XLS]

## Sheet: TableS4
Table S4. Comparison of fold change (log2ratio) from tissue-wide transcriptomic and proteomic comparison. Gene locus number was used as a common identifier to build the 504 probe set / protein pairs.
Locus	Probe	RNA_log2ratio_A0vsE0	Protein	Protein_log2ratio_A0vsE0
LOC_Os01g01307	Os.10818.1.S1_at	-0.55	LOC_Os01g01307.1	-0.7
LOC_Os01g02880	Os.1981.1.S1_at	-0.1	LOC_Os01g02880.1	-4.73
LOC_Os01g03760	Os.4629.1.S1_at	-0.31	LOC_Os01g03760.1	-2.68
LOC_Os01g04370	Os.4775.2.S1_at	0.02	LOC_Os01g04370.1	-5.4
LOC_Os01g07810	Os.6842.1.S1_at	0.05	LOC_Os01g07810.1	-0.93
LOC_Os01g09010	Os.4905.1.S1_a_at	1.13	LOC_Os01g09010.1	-2.67
LOC_Os01g10820	Os.1404.1.S1_at	-0.57	LOC_Os01g10820.1	-2.8
LOC_Os01g12580	Os.1205.1.S1_at	-0.44	LOC_Os01g12580.1	-5.52
LOC_Os01g13700	Os.16332.1.S1_at	-0.32	LOC_Os01g13700.1	-2.36
LOC_Os01g15010	Os.10633.1.S1_at	-0.04	LOC_Os01g15010.1	-3.94
LOC_Os01g15600	Os.1173.1.S1_at	-0.19	LOC_Os01g15600.1	-3.78
LOC_Os01g16430	Os.6850.1.S1_at	0.07	LOC_Os01g16430.1	-4.04
LOC_Os01g16890	Os.206.1.S1_at	-1.32	LOC_Os01g16890.1	-4.45
LOC_Os01g16900	Os.207.1.S1_at	-0.1	LOC_Os01g16900.1	-4.16
LOC_Os01g16920	Os.209.1.S1_at	0.04	LOC_Os01g16920.1	-5.94
LOC_Os01g18050	Os.7126.1.S1_at	-1.01532	LOC_Os01g18050.1	-3.84
LOC_Os01g19450	Os.8730.1.S1_at	0.09	LOC_Os01g19450.1	-2.01
LOC_Os01g22520	Os.1506.1.S1_at	0.22	LOC_Os01g22520.1	-5.62
LOC_Os01g23610	Os.20630.1.S1_at	-0.4	LOC_Os01g23610.1	-2.81
LOC_Os01g24690	Os.11335.4.S1_at	-0.95	LOC_Os01g24690.1	-1.15
LOC_Os01g27520	Os.10973.1.S1_at	-0.62	LOC_Os01g27520.1	-1.41
LOC_Os01g34700	Os.7133.1.S1_at	-1.31	LOC_Os01g34700.1	-3.5
LOC_Os01g36930	Os.9089.1.S1_at	-0.59	LOC_Os01g36930.1	-3.09
LOC_Os01g37800	Os.6802.1.S1_at	0.35	LOC_Os01g37800.1	0
LOC_Os01g37837	Os.5952.2.S1_s_at	0.64	LOC_Os01g37837.1	-3.99
LOC_Os01g37960	Os.11353.1.S1_at	0.21	LOC_Os01g37960.1	-1.31
LOC_Os01g38970	Os.48825.1.S1_at	-0.43	LOC_Os01g38970.1	-3.49
LOC_Os01g42520	Os.4683.2.S1_at	-3.13	LOC_Os01g42520.1	-2.38
LOC_Os01g43090	Os.45885.1.S1_s_at	-1.66	LOC_Os01g43090.1	-4.52
LOC_Os01g43410	Os.27820.1.S1_at	-0.52	LOC_Os01g43410.1	-2.1
LOC_Os01g44220	Os.6732.1.S1_a_at	5.65669	LOC_Os01g44220.1	6.08
LOC_Os01g46070	Os.12729.1.S1_at	-0.54	LOC_Os01g46070.1	-4.74
LOC_Os01g46380	Os.21537.1.S1_x_at	-1.03	LOC_Os01g46380.1	-1.44
LOC_Os01g46610	Os.12610.1.S1_at	0.31	LOC_Os01g46610.1	-3.63
LOC_Os01g46750	Os.19404.1.S1_at	0.13	LOC_Os01g46750.1	-1.21
LOC_Os01g47660	OsAffx.23701.1.S1_at	-0.5	LOC_Os01g47660.1	-0.03
LOC_Os01g47730	Os.41776.1.S1_at	2.06	LOC_Os01g47730.1	2.24
LOC_Os01g49190	Os.10496.1.S1_at	-0.95	LOC_Os01g49190.1	-2.38
LOC_Os01g49290	Os.4684.1.S1_at	-1.29	LOC_Os01g49290.1	-2.06
LOC_Os01g50700	Os.3419.1.S1_a_at	-0.01	LOC_Os01g50700.1	-4.43
LOC_Os01g50910	Os.10933.1.S1_at	-0.42	LOC_Os01g50910.1	-6.87
LOC_Os01g54030	Os.47303.1.S1_at	0.42	LOC_Os01g54030.1	-4.23
LOC_Os01g55690	OsAffx.27508.71.S1_s_at	5.74	LOC_Os01g55690.1	3.51
LOC_Os01g57450	Os.34258.1.S1_at	-0.07	LOC_Os01g57450.1	-2.31
LOC_Os01g59740	Os.7103.1.S1_at	-0.63	LOC_Os01g59740.1	-4.87
LOC_Os01g60190	Os.4899.1.S1_a_at	-0.38	LOC_Os01g60190.1	-1.17
LOC_Os01g61380	Os.5740.1.S1_at	-1.22	LOC_Os01g61380.1	-1.01
LOC_Os01g62290	Os.46024.1.S1_at	-0.27	LOC_Os01g62290.1	-3.55
LOC_Os01g65090	Os.7646.1.S1_a_at	0.37	LOC_Os01g65090.1	2.15
LOC_Os01g66560	Os.7290.1.S1_s_at	-0.92	LOC_Os01g66560.1	-2.23
LOC_Os01g66720	Os.8821.1.S1_at	1.6	LOC_Os01g66720.1	-2.07
LOC_Os01g66940	Os.8324.1.S1_a_at	0.59	LOC_Os01g66940.1	-2.69
LOC_Os01g67134	Os.9738.1.S1_at	-1.45	LOC_Os01g67134.1	-3.07
LOC_Os01g67860	Os.8999.1.S1_at	0.46	LOC_Os01g67860.1	-3.28
LOC_Os01g68770	Os.8353.1.S1_at	0.56	LOC_Os01g68770.1	0.05
LOC_Os01g69080	Os.11114.1.S1_at	-1.3	LOC_Os01g69080.1	-5.72
LOC_Os01g70170	Os.8049.1.S1_a_at	0.96	LOC_Os01g70170.1	-1.57
LOC_Os01g71090	Os.4856.1.S1_at	3.5	LOC_Os01g71090.1	-2.77
LOC_Os01g71230	Os.12071.1.S1_at	-0.67	LOC_Os01g71230.1	-5.03
LOC_Os01g73160	Os.15262.1.S1_at	-1.41	LOC_Os01g73160.1	-3.73
LOC_Os01g73310	Os.18675.1.S1_at	-2.04	LOC_Os01g73310.1	-3.06
LOC_Os01g73790	Os.4743.1.S1_at	0.33	LOC_Os01g73790.1	-0.9
LOC_Os02g01010	Os.13477.1.S1_at	-1.36	LOC_Os02g01010.1	2.71
LOC_Os02g02410	Os.1311.1.S1_at	1.65	LOC_Os02g02410.1	1.29
LOC_Os02g02870	Os.4724.1.S1_at	1.03	LOC_Os02g02870.1	-1.81
LOC_Os02g03260	Os.8913.1.S1_at	0.23	LOC_Os02g03260.1	1.85
LOC_Os02g03860	Os.8662.1.S1_at	-0.75	LOC_Os02g03860.1	-4.86
LOC_Os02g04100	Os.12193.1.S1_at	-0.03	LOC_Os02g04100.1	-5.39
LOC_Os02g04660	Os.17772.1.S1_at	-0.55	LOC_Os02g04660.1	-1.69
LOC_Os02g06410	Os.55564.1.S1_at	-0.89	LOC_Os02g06410.1	-8.13
LOC_Os02g06700	Os.7876.1.S1_at	-1.12	LOC_Os02g06700.2	-2.97
LOC_Os02g07120	Os.17204.1.S1_at	0.08	LOC_Os02g07120.1	-3.25
LOC_Os02g07260	Os.26566.1.S1_at	0.12	LOC_Os02g07260.1	-1.28
LOC_Os02g07490	Os.48052.1.S1_at	-0.08	LOC_Os02g07490.1	-0.81
LOC_Os02g10070	Os.4264.1.S1_at	-0.28	LOC_Os02g10070.1	-4.67
LOC_Os02g10260	Os.27720.1.S1_at	-0.16	LOC_Os02g10260.1	1.56
LOC_Os02g10510	Os.9235.1.S1_at	0.7	LOC_Os02g10510.1	-2.75
LOC_Os02g10640	Os.292.1.S1_a_at	-0.36	LOC_Os02g10640.1	-3.34
LOC_Os02g10810	Os.9295.1.S1_at	-0.62	LOC_Os02g10810.1	-2.63
LOC_Os02g11050	Os.317.1.S1_at	-0.09	LOC_Os02g11050.1	-5.27
LOC_Os02g12650	Os.11236.1.S1_at	-0.6	LOC_Os02g12650.1	-4.53
LOC_Os02g13530	Os.10120.3.S1_at	-1.11	LOC_Os02g13530.1	-3.45
LOC_Os02g13840	Os.11467.1.S1_at	0.47	LOC_Os02g13840.1	-1.65
LOC_Os02g14059	Os.13546.1.S1_at	-1.16	LOC_Os02g14059.1	-2.62
LOC_Os02g14600	Os.38686.1.S1_at	6.74	LOC_Os02g14600.1	6.53
LOC_Os02g15090	Os.14012.1.S1_at	6	LOC_Os02g15090.1	5.84
LOC_Os02g15250	OsAffx.12050.1.S1_at	0.18	LOC_Os02g15250.1	-4.49
LOC_Os02g17390	Os.9729.1.S1_a_at	0.29	LOC_Os02g17390.1	-2.45
LOC_Os02g18550	Os.2249.1.S1_at	-1.18	LOC_Os02g18550.1	-2.79
LOC_Os02g21460	Os.27095.1.A1_at	-0.13	LOC_Os02g21460.1	-1.93
LOC_Os02g21660	Os.8864.1.S1_at	-0.68	LOC_Os02g21660.1	-4.44
LOC_Os02g22780	Os.9114.1.S1_at	-0.96	LOC_Os02g22780.1	-4.18
LOC_Os02g24020	Os.4716.1.S1_at	-0.99	LOC_Os02g24020.1	-1.7
LOC_Os02g24354	Os.12054.1.S1_at	-0.17	LOC_Os02g24354.1	-1.16
LOC_Os02g28810	Os.4748.1.S1_at	-1.09	LOC_Os02g28810.1	-3.09
LOC_Os02g30310	Os.10838.1.S1_a_at	-1.23	LOC_Os02g30310.1	-0.35
LOC_Os02g30630	Os.1851.1.S1_at	-0.66	LOC_Os02g30630.1	1.78
LOC_Os02g32030	Os.4705.1.S1_at	-0.96	LOC_Os02g32030.1	3
LOC_Os02g32660	Os.6796.1.S1_a_at	3.61	LOC_Os02g32660.1	6.53
LOC_Os02g32860	Os.54236.1.S1_at	-0.43	LOC_Os02g32860.1	-7.46
LOC_Os02g33450	Os.12196.1.S1_at	-0.34	LOC_Os02g33450.1	-3.82
LOC_Os02g36974	Os.3440.1.S2_at	0.5	LOC_Os02g36974.1	0.87
LOC_Os02g37420	Os.4187.1.S1_at	1.29	LOC_Os02g37420.1	-1.75
LOC_Os02g37862	Os.11104.1.S1_at	-1.15	LOC_Os02g37862.1	-2.03
LOC_Os02g38210	Os.4831.1.S1_a_at	-0.84	LOC_Os02g38210.1	-2.41
LOC_Os02g38920	Os.22781.1.S1_at	-0.64	LOC_Os02g38920.1	-3.49
LOC_Os02g40830	Os.9758.1.S1_at	0.24	LOC_Os02g40830.1	-4.03
LOC_Os02g40880	OsAffx.2932.1.S1_s_at	-0.78	LOC_Os02g40880.1	-3.07
LOC_Os02g41590	Os.6634.1.S1_at	-0.516761	LOC_Os02g41590.1	-3.16
LOC_Os02g43010	Os.15696.1.S1_a_at	0.25	LOC_Os02g43010.1	-5.57
LOC_Os02g43020	Os.13461.1.S1_at	-0.07	LOC_Os02g43020.1	-2.35
LOC_Os02g43830	Os.1354.1.S1_a_at	-1.09	LOC_Os02g43830.1	1.06
LOC_Os02g44500	Os.4833.1.S1_at	0.35	LOC_Os02g44500.1	-4.44
LOC_Os02g44520	Os.27950.1.S2_a_at	-0.45	LOC_Os02g44520.1	-3.61
LOC_Os02g46130	Os.12716.1.S1_a_at	-0.28	LOC_Os02g46130.1	-2.19
LOC_Os02g47140	Os.11528.1.S1_at	-0.77	LOC_Os02g47140.1	-2.29
LOC_Os02g47590	Os.16681.1.S1_at	-0.48	LOC_Os02g47590.1	-0.04
LOC_Os02g47850	Os.10852.1.S1_s_at	-0.92	LOC_Os02g47850.2	-0.91
LOC_Os02g47940	Os.16087.1.S1_at	1.67	LOC_Os02g47940.1	-1.23
LOC_Os02g48110	Os.9747.1.S1_at	-0.23	LOC_Os02g48110.1	-2.49
LOC_Os02g48720	Os.9282.1.S1_at	-0.49	LOC_Os02g48720.1	-0.3
LOC_Os02g49090	Os.26580.1.A1_at	-0.56	LOC_Os02g49090.1	-2.56
LOC_Os02g50350	Os.4862.1.S1_at	0.68	LOC_Os02g50350.1	3.55
LOC_Os02g50620	Os.10143.1.S1_at	0.3	LOC_Os02g50620.1	2.54
LOC_Os02g51750	Os.11915.1.S1_at	-0.55	LOC_Os02g51750.1	-7.32
LOC_Os02g52860	Os.8496.1.S1_at	-0.38	LOC_Os02g52860.1	-3.84
LOC_Os02g52880	Os.10895.1.S1_at	-0.43	LOC_Os02g52880.1	-1.9
LOC_Os02g53060	Os.3707.1.S1_at	-0.28	LOC_Os02g53060.1	-4.32
LOC_Os02g53420	Os.10873.1.S1_at	-0.61	LOC_Os02g53420.1	-2.07
LOC_Os02g54700	Os.10955.1.S1_at	-1.01	LOC_Os02g54700.2	-3.53
LOC_Os02g55140	Os.5433.1.S1_at	0.05	LOC_Os02g55140.1	-3.06
LOC_Os02g55420	Os.18547.1.S1_at	0.04	LOC_Os02g55420.1	-3.38
LOC_Os02g56000	Os.145.1.S1_a_at	-0.01	LOC_Os02g56000.1	-5.22
LOC_Os02g57040	Os.407.1.S1_at	-0.93	LOC_Os02g57040.1	-6.13
LOC_Os02g57260	Os.8733.1.S1_at	0.8	LOC_Os02g57260.1	-1.66
LOC_Os02g57640	Os.27579.1.A1_at	-0.34	LOC_Os02g57640.1	-3.42
LOC_Os02g58510	Os.27193.1.S1_at	-1.04	LOC_Os02g58510.1	-3.04
LOC_Os03g02050	Os.2239.1.S1_at	0.65	LOC_Os03g02050.1	-1.52
LOC_Os03g03810	Os.10652.1.S1_at	2.09	LOC_Os03g03810.1	-0.89
LOC_Os03g04410	Os.7192.1.S1_at	-0.28	LOC_Os03g04410.1	-7.41
LOC_Os03g04960	Os.17914.1.S1_at	-0.06	LOC_Os03g04960.1	0.28
LOC_Os03g04970	Os.8911.1.S1_at	-0.15	LOC_Os03g04970.1	-2.49
LOC_Os03g05730	Os.4689.1.S1_at	-0.05	LOC_Os03g05730.1	-3.18
LOC_Os03g06200	Os.4891.1.S1_at	0.39	LOC_Os03g06200.1	-1.78
LOC_Os03g06360	Os.27956.1.S1_at	-0.23	LOC_Os03g06360.1	-7.18
LOC_Os03g07570	Os.17960.1.S1_at	0.1	LOC_Os03g07570.1	2.3
LOC_Os03g07840	Os.8295.1.S1_at	-0.65	LOC_Os03g07840.1	-0.58
LOC_Os03g08280	Os.3704.1.S1_at	-0.38	LOC_Os03g08280.1	-3.56
LOC_Os03g08440	Os.10138.2.S1_a_at	-0.79	LOC_Os03g08440.1	1.75
LOC_Os03g08450	Os.48055.1.S1_at	-0.31	LOC_Os03g08450.1	-4.91
LOC_Os03g10340	Os.5282.1.S1_at	-1.11	LOC_Os03g10340.1	-3.86
LOC_Os03g10510	Os.6631.1.S1_at	-0.9	LOC_Os03g10510.1	-1.97
LOC_Os03g11440	Os.28148.1.S1_at	-0.44	LOC_Os03g11440.1	-2.4
LOC_Os03g12230	Os.48013.1.A1_at	2.63	LOC_Os03g12230.1	-1.72
LOC_Os03g14180	Os.8926.1.S1_at	-0.53	LOC_Os03g14180.1	-7.47
LOC_Os03g14450	Os.10756.1.S1_at	-0.45	LOC_Os03g14450.1	-4.93
LOC_Os03g14990	Os.17891.1.S1_at	0.04	LOC_Os03g14990.1	-2.63
LOC_Os03g15950	Os.14701.1.S1_a_at	-0.27	LOC_Os03g15950.1	0.37
LOC_Os03g15960	Os.12244.1.S1_at	0.01	LOC_Os03g15960.1	-7.49
LOC_Os03g16440	Os.12583.1.S1_at	3.05	LOC_Os03g16440.1	4.51
LOC_Os03g16940	Os.16041.1.S1_at	0.66	LOC_Os03g16940.1	-4.12
LOC_Os03g16980	Os.12349.1.S1_at	-0.39	LOC_Os03g16980.1	-4.1
LOC_Os03g18510	Os.11646.1.S1_at	0.57	LOC_Os03g18510.1	-1.15
LOC_Os03g18590	Os.7592.1.S1_at	-0.09	LOC_Os03g18590.1	-0.64
LOC_Os03g18810	Os.4665.1.S1_at	-1.06	LOC_Os03g18810.1	1.69
LOC_Os03g19290	Os.11491.1.S1_at	-0.05	LOC_Os03g19290.1	-7.42
LOC_Os03g19410	Os.9620.1.S1_at	0.02	LOC_Os03g19410.1	0.64
LOC_Os03g19890	Os.12831.1.S1_at	-0.82	LOC_Os03g19890.1	-2.22
LOC_Os03g20680	OsAffx.12954.1.S1_at	-0.41	LOC_Os03g20680.1	-4.69
LOC_Os03g21040	Os.12186.1.S1_at	-1.12	LOC_Os03g21040.2	-4.6
LOC_Os03g21490	Os.37473.1.S1_x_at	0.01	LOC_Os03g21490.1	0.17
LOC_Os03g21950	Os.6783.1.S1_s_at	0.07	LOC_Os03g21950.1	-0.66
LOC_Os03g22120	Os.17890.1.S1_at	0.66	LOC_Os03g22120.1	0.7
LOC_Os03g22810	Os.186.1.S1_at	0.02	LOC_Os03g22810.1	-1.59
LOC_Os03g26490	Os.55461.1.S1_at	0.36	LOC_Os03g26490.1	-4.28
LOC_Os03g27260	Os.10256.1.S1_at	-0.44	LOC_Os03g27260.1	-0.62
LOC_Os03g28330	Os.25677.1.S1_at	-0.804678	LOC_Os03g28330.1	0.65
LOC_Os03g28410	Os.12262.1.S1_at	-1.55	LOC_Os03g28410.1	-1.87
LOC_Os03g29260	Os.183.1.S1_at	-0.85	LOC_Os03g29260.2	-1.94
LOC_Os03g31300	Os.7626.1.S1_at	0.05	LOC_Os03g31300.1	-0.12
LOC_Os03g31360	Os.8013.1.S1_at	6.31	LOC_Os03g31360.1	4.34
LOC_Os03g37970	Os.12362.1.S1_at	-1.24	LOC_Os03g37970.1	-0.23
LOC_Os03g38000	Os.21763.1.S1_at	-0.76	LOC_Os03g38000.1	0.42
LOC_Os03g38980	Os.27850.1.S1_at	-0.09	LOC_Os03g38980.1	-0.43
LOC_Os03g40270	Os.5039.1.S1_at	0.22	LOC_Os03g40270.1	-2.16
LOC_Os03g41419	Os.50445.1.S1_at	-0.45	LOC_Os03g41419.1	-3.86
LOC_Os03g42110	Os.16888.1.A1_at	-0.07	LOC_Os03g42110.1	2.27
LOC_Os03g45320	Os.17724.1.S1_at	-0.55	LOC_Os03g45320.1	-0.69
LOC_Os03g46490	Os.39897.1.S1_at	-1.24	LOC_Os03g46490.1	-2.32
LOC_Os03g48930	Os.9323.1.S1_at	0.5	LOC_Os03g48930.1	-4.56
LOC_Os03g49190	Os.12251.1.S1_at	0.16	LOC_Os03g49190.1	-2.88
LOC_Os03g50290	Os.2673.1.S1_at	-0.51	LOC_Os03g50290.1	-3.56
LOC_Os03g50340	Os.37960.1.S1_at	-0.8	LOC_Os03g50340.1	-1.75
LOC_Os03g50540	Os.12117.1.S1_at	-0.72	LOC_Os03g50540.1	-4.91
LOC_Os03g52490	Os.15899.1.S1_at	-0.72	LOC_Os03g52490.1	-2.28
LOC_Os03g52840	Os.12148.1.S1_at	0	LOC_Os03g52840.1	-3.98
LOC_Os03g54890	Os.12202.1.S1_at	-0.8	LOC_Os03g54890.1	-1.76
LOC_Os03g55070	Os.5016.1.S1_at	-0.64	LOC_Os03g55070.1	0.86
LOC_Os03g55090	Os.11216.1.S1_at	1.36	LOC_Os03g55090.1	4.54
LOC_Os03g55280	Os.10389.1.S1_at	-0.29	LOC_Os03g55280.1	-2.03
LOC_Os03g56790	Os.2813.1.S1_at	1.35	LOC_Os03g56790.1	0.79
LOC_Os03g57960	Os.8208.1.S1_at	0.21	LOC_Os03g57960.1	-4.53
LOC_Os03g58050	Os.28088.1.S1_at	-0.62	LOC_Os03g58050.1	-4.14
LOC_Os03g58430	Os.12005.1.S1_at	-1.12	LOC_Os03g58430.1	-2.27
LOC_Os03g59020	Os.20293.1.S1_at	-0.84	LOC_Os03g59020.1	-5.68
LOC_Os03g59050	Os.12218.1.S1_at	2.23	LOC_Os03g59050.1	0.8
LOC_Os03g59060	Os.9183.1.S1_at	-0.19	LOC_Os03g59060.1	-1.5
LOC_Os03g59310	Os.11049.1.S1_at	-1.07	LOC_Os03g59310.1	-4.38
LOC_Os03g60550	Os.17427.1.S1_at	-0.51	LOC_Os03g60550.1	-1.83
LOC_Os03g60580	Os.39973.1.S1_s_at	0.38	LOC_Os03g60580.1	-4.39
LOC_Os03g60620	Os.11822.1.S1_at	-0.98	LOC_Os03g60620.1	0.57
LOC_Os03g60740	Os.17911.1.S1_at	0.32	LOC_Os03g60740.1	0.73
LOC_Os03g61600	Os.13812.1.S1_a_at	-1.27	LOC_Os03g61600.1	-4.03
LOC_Os03g62590	Os.16157.1.S1_at	0.61	LOC_Os03g62590.1	-3.32
LOC_Os03g63410	Os.10987.1.S1_at	-1.05	LOC_Os03g63410.1	-4.72
LOC_Os03g63860	Os.9474.1.S1_at	0.19	LOC_Os03g63860.1	-2.35
LOC_Os04g01290	Os.6368.1.S1_at	-0.52	LOC_Os04g01290.1	-3.23
LOC_Os04g01590	Os.25208.1.S1_at	-0.04	LOC_Os04g01590.1	-5.26
LOC_Os04g02900	Os.15076.1.S1_at	-0.83	LOC_Os04g02900.1	-3.13
LOC_Os04g19740	Os.18381.1.S1_at	-0.68	LOC_Os04g19740.1	-4.07
LOC_Os04g28180	Os.11541.1.S1_at	-0.84	LOC_Os04g28180.1	-1.76
LOC_Os04g30780	Os.8580.1.S1_at	-0.83	LOC_Os04g30780.1	-4.09
LOC_Os04g31700	Os.8672.1.S1_at	-0.01	LOC_Os04g31700.1	0.07
LOC_Os04g32020	Os.11872.2.S1_at	0	LOC_Os04g32020.1	-0.99
LOC_Os04g32070	Os.54991.1.S1_at	-0.35	LOC_Os04g32070.1	-6.55
LOC_Os04g32330	Os.8748.1.S1_at	-0.22	LOC_Os04g32330.1	-1.76
LOC_Os04g32560	Os.37370.1.S1_at	0.05	LOC_Os04g32560.1	-1.51
LOC_Os04g32650	Os.5857.1.S1_at	-0.21	LOC_Os04g32650.1	-1.65
LOC_Os04g32950	Os.11092.1.S1_at	-0.25	LOC_Os04g32950.1	-3
LOC_Os04g33150	Os.46073.1.A1_at	1.86	LOC_Os04g33150.1	4.14
LOC_Os04g35090	Os.426.1.S1_at	-1.06	LOC_Os04g35090.1	-4.48
LOC_Os04g35900	Os.6065.1.S1_at	-0.73	LOC_Os04g35900.1	-1.52
LOC_Os04g36700	Os.15234.1.S1_at	-0.79	LOC_Os04g36700.1	-4.17
LOC_Os04g36859	Os.8619.1.S1_at	-0.14	LOC_Os04g36859.1	0.67
LOC_Os04g38870	Os.4837.1.S1_at	1.94	LOC_Os04g38870.1	-0.08
LOC_Os04g40660	Os.22519.1.A1_at	0.1	LOC_Os04g40660.1	4.59
LOC_Os04g40950	Os.28374.1.S1_at	-0.84	LOC_Os04g40950.1	-3.24
LOC_Os04g40990	Os.26687.1.S1_at	1.57	LOC_Os04g40990.1	-0.62
LOC_Os04g42140	Os.4805.1.S1_a_at	-0.29	LOC_Os04g42140.1	-1.28
LOC_Os04g42920	Os.27539.1.A1_at	-0.16	LOC_Os04g42920.1	-0.85
LOC_Os04g43170	Os.5717.1.S1_at	-0.08	LOC_Os04g43170.1	-5.31
LOC_Os04g43200	Os.2694.1.S1_at	2.32	LOC_Os04g43200.1	-0.8
LOC_Os04g44470	Os.5324.1.S1_at	3.93779	LOC_Os04g44470.1	0.87
LOC_Os04g44560	Os.18634.1.S1_at	-0.11	LOC_Os04g44560.1	0.09
LOC_Os04g46200	Os.10663.1.S1_at	0.15	LOC_Os04g46200.1	-3.18
LOC_Os04g48490	OsAffx.14326.1.S1_s_at	0.26	LOC_Os04g48490.1	-1.74
LOC_Os04g50204	Os.6872.2.S1_at	4.12	LOC_Os04g50204.1	2.73
LOC_Os04g51910	Os.15719.1.S1_at	-0.47	LOC_Os04g51910.1	-5.19
LOC_Os04g52110	Os.53526.1.S1_at	-0.16	LOC_Os04g52110.1	-5.01
LOC_Os04g52130	Os.17919.1.S1_at	-0.39	LOC_Os04g52130.1	-0.57
LOC_Os04g52361	Os.12042.1.S1_at	-0.5	LOC_Os04g52361.1	-1.96
LOC_Os04g52460	Os.38093.1.S1_at	-0.03	LOC_Os04g52460.1	2.05
LOC_Os04g52850	Os.19751.1.S1_at	-0.34	LOC_Os04g52850.1	-1.13
LOC_Os04g55060	Os.13976.1.S1_at	-0.06	LOC_Os04g55060.1	-3.34
LOC_Os04g55720	Os.5551.1.S1_at	-0.14	LOC_Os04g55720.1	0.81
LOC_Os04g56646	Os.5973.1.S1_at	-0.32	LOC_Os04g56646.1	-2.07
LOC_Os04g57590	Os.9269.1.S1_at	-0.21	LOC_Os04g57590.1	-2.41
LOC_Os04g59040	Os.9831.1.S1_at	0.39	LOC_Os04g59040.1	-2.34
LOC_Os05g01262	Os.8646.1.S1_at	-0.79	LOC_Os05g01262.1	0.45
LOC_Os05g01820	Os.3430.1.S1_at	0.66	LOC_Os05g01820.1	-3.33
LOC_Os05g02060	Os.10155.1.S1_at	3.97	LOC_Os05g02060.1	3.03
LOC_Os05g02520	Os.28047.1.S1_at	1.43	LOC_Os05g02520.1	0.51
LOC_Os05g02530	Os.12706.1.S1_at	-0.49	LOC_Os05g02530.1	-0.36
LOC_Os05g04870	Os.13800.1.S1_at	-0.27	LOC_Os05g04870.1	-4.9
LOC_Os05g05470	Os.4990.1.S1_at	-0.7	LOC_Os05g05470.1	-4.94
LOC_Os05g05840	Os.3394.1.S1_at	-0.1	LOC_Os05g05840.1	-1.27
LOC_Os05g05950	Os.9224.1.S1_at	0.33	LOC_Os05g05950.1	2.55
LOC_Os05g06310	Os.12160.1.S1_at	-0.93	LOC_Os05g06310.1	-2.6
LOC_Os05g06350	Os.4378.2.S2_a_at	0.33	LOC_Os05g06350.1	0.32
LOC_Os05g06460	Os.24899.1.A1_at	-1.12	LOC_Os05g06460.1	-5.15
LOC_Os05g06500	Os.10691.1.S1_at	0.81	LOC_Os05g06500.1	-2.44
LOC_Os05g08840	Os.26495.1.S1_at	-1.19	LOC_Os05g08840.1	-4.04
LOC_Os05g08990	Os.12172.1.S1_at	-0.37	LOC_Os05g08990.1	1.41
LOC_Os05g13950	Os.10033.1.S1_at	-0.78	LOC_Os05g13950.1	-4.68
LOC_Os05g16660	Os.48078.1.S1_at	-0.38	LOC_Os05g16660.1	2.08
LOC_Os05g23740	Os.9688.1.S1_at	-0.22	LOC_Os05g23740.1	0.79
LOC_Os05g23860	Os.1322.1.S1_at	0.05	LOC_Os05g23860.1	0.97
LOC_Os05g24601	Os.7223.1.S1_at	-0.37	LOC_Os05g24601.1	-3.89
LOC_Os05g25310	Os.7310.1.S1_at	0.22	LOC_Os05g25310.1	-4.37
LOC_Os05g25850	Os.4610.1.S1_at	-0.59	LOC_Os05g25850.1	-6.13
LOC_Os05g27940	Os.12203.1.S1_at	-1.52	LOC_Os05g27940.1	-5.81
LOC_Os05g28280	Os.1378.1.S1_at	-0.41	LOC_Os05g28280.1	-2.21
LOC_Os05g28510	Os.3381.1.S1_a_at	-1.14	LOC_Os05g28510.1	-3.03
LOC_Os05g31000	Os.12854.1.S1_at	-0.72	LOC_Os05g31000.1	-3.89
LOC_Os05g33380	Os.2697.1.S1_a_at	0.789098	LOC_Os05g33380.1	-3.69
LOC_Os05g33570	Os.7144.2.S1_a_at	3.47	LOC_Os05g33570.1	5.79
LOC_Os05g35460	Os.15008.1.S1_at	0.26	LOC_Os05g35460.1	-3.15
LOC_Os05g36290	Os.11355.1.S1_at	0.87	LOC_Os05g36290.1	-1.72
LOC_Os05g37330	Os.12360.1.S1_at	-0.24	LOC_Os05g37330.1	-7.38
LOC_Os05g37970	Os.5299.2.S1_a_at	0.26	LOC_Os05g37970.3	0.37
LOC_Os05g39250	OsAffx.4557.1.S1_s_at	-0.39	LOC_Os05g39250.1	-7.67
LOC_Os05g39690	Os.9824.1.S2_at	0.08	LOC_Os05g39690.1	-5.45
LOC_Os05g40420	Os.4718.1.S1_at	-0.36	LOC_Os05g40420.1	-4.11
LOC_Os05g41210	Os.10290.1.S1_at	-0.97	LOC_Os05g41210.1	-6.14
LOC_Os05g41640	Os.9261.1.A1_at	-0.5	LOC_Os05g41640.1	-3.38
LOC_Os05g41970	Os.10338.1.S1_x_at	6.45	LOC_Os05g41970.1	6.74
LOC_Os05g42230	Os.11180.1.S1_at	-0.19	LOC_Os05g42230.1	-5.33
LOC_Os05g44050	Os.12305.1.S1_at	0.46	LOC_Os05g44050.1	-4.11
LOC_Os05g44340	Os.8971.1.S1_at	-0.24	LOC_Os05g44340.1	-6.86
LOC_Os05g45950	Os.4771.1.S1_at	-0.56	LOC_Os05g45950.1	-3.69
LOC_Os05g46480	Os.12551.1.S1_s_at	0.11	LOC_Os05g46480.1	-5.88
LOC_Os05g46560	OsAffx.4638.1.S1_s_at	-0.9	LOC_Os05g46560.1	-5.6
LOC_Os05g48340	Os.5594.1.S1_at	0.19	LOC_Os05g48340.1	-4.67
LOC_Os05g49150	Os.11175.1.S1_at	-1.02	LOC_Os05g49150.1	-1.21
LOC_Os05g49440	Os.2250.1.S1_a_at	-0.45	LOC_Os05g49440.2	-7.62
LOC_Os05g49800	Os.4761.1.S1_at	-0.7	LOC_Os05g49800.1	2.06
LOC_Os05g49890	Os.8152.1.S1_at	-0.12	LOC_Os05g49890.1	-4.01
LOC_Os05g50380	Os.4166.1.S1_at	-0.57	LOC_Os05g50380.1	-1.43
LOC_Os05g51540	Os.14691.1.S1_at	0.9	LOC_Os05g51540.1	-3.96
LOC_Os06g01490	Os.4421.1.S1_at	-0.35	LOC_Os06g01490.1	-0.95
LOC_Os06g02144	Os.7894.1.S1_at	0.86	LOC_Os06g02144.1	-3.72
LOC_Os06g02380	Os.12628.1.S1_at	0.26	LOC_Os06g02380.1	0.15
LOC_Os06g02510	Os.12590.1.S1_at	-1.09	LOC_Os06g02510.1	-0.8
LOC_Os06g04270	Os.609.1.S2_a_at	0.47	LOC_Os06g04270.1	-2.1
LOC_Os06g05880	Os.10152.1.S1_at	0.81	LOC_Os06g05880.1	-3.31
LOC_Os06g06030	Os.10995.1.S1_at	0.22	LOC_Os06g06030.1	-3.35
LOC_Os06g06560	Os.12725.1.S1_at	-0.02	LOC_Os06g06560.1	2.85
LOC_Os06g06790	Os.4371.1.S1_a_at	-1.53	LOC_Os06g06790.1	-0.99
LOC_Os06g09450	Os.9127.1.S1_a_at	2.98163	LOC_Os06g09450.1	6.62
LOC_Os06g09630	Os.7644.1.S1_at	0.02	LOC_Os06g09630.1	-2.6
LOC_Os06g11812	Os.55513.1.S1_at	1.45	LOC_Os06g11812.1	-0.14
LOC_Os06g13810	Os.10991.1.S1_at	-0.19	LOC_Os06g13810.1	-2.07
LOC_Os06g13820	Os.5175.1.S1_at	0.22	LOC_Os06g13820.1	-4.43
LOC_Os06g14510	Os.4697.1.S1_at	-0.14	LOC_Os06g14510.1	-0.34
LOC_Os06g15360	Os.10308.1.S1_at	0.04	LOC_Os06g15360.1	-3.4
LOC_Os06g15990	Os.2447.1.S1_at	1.4	LOC_Os06g15990.1	-3.95
LOC_Os06g23350	Os.55197.1.S1_at	-0.37	LOC_Os06g23350.1	-4.46
LOC_Os06g29180	Os.4156.1.S1_at	0.73	LOC_Os06g29180.1	-0.7
LOC_Os06g30310	Os.18215.1.S1_at	-0.79	LOC_Os06g30310.1	-5
LOC_Os06g30370	Os.16218.1.S1_at	5.32	LOC_Os06g30370.1	3.08
LOC_Os06g31070	Os.5918.1.S1_at	4.11	LOC_Os06g31070.1	4.57
LOC_Os06g31210	Os.2620.1.S1_at	-1.11	LOC_Os06g31210.1	1.45
LOC_Os06g34690	Os.12204.1.S1_at	-0.79	LOC_Os06g34690.1	-5.89
LOC_Os06g35814	Os.2675.1.S1_at	-0.75	LOC_Os06g35814.1	-1.72
LOC_Os06g37440	Os.10471.1.S1_a_at	-1.58	LOC_Os06g37440.1	-1.63
LOC_Os06g39344	Os.6374.1.S1_at	-0.08	LOC_Os06g39344.1	-4.05
LOC_Os06g39760	Os.15810.2.S1_x_at	-0.96	LOC_Os06g39760.1	-1.86
LOC_Os06g42000	Os.9313.1.S1_at	-0.42	LOC_Os06g42000.1	-5.8
LOC_Os06g43760	Os.8879.1.S1_at	-0.23	LOC_Os06g43760.1	-0.6
LOC_Os06g43850	Os.12365.1.S1_at	0	LOC_Os06g43850.1	-5.87
LOC_Os06g45710	Os.11118.1.S1_at	-0.25	LOC_Os06g45710.1	-4.14
LOC_Os06g47320	Os.11699.1.S1_at	-1.33	LOC_Os06g47320.1	-4.71
LOC_Os06g49110	Os.7836.1.S1_s_at	1.2	LOC_Os06g49110.1	0.92
LOC_Os06g49480	Os.11856.1.S1_at	-0.34	LOC_Os06g49480.1	-5.23
LOC_Os07g03230	Os.48081.1.S1_at	-0.4	LOC_Os07g03230.1	-2.9
LOC_Os07g05580	Os.4779.1.S1_at	-1.02	LOC_Os07g05580.1	-3.53
LOC_Os07g07410	Os.18299.1.S1_at	0.04	LOC_Os07g07410.1	-4.15
LOC_Os07g08330	Os.11425.1.S1_at	-0.9	LOC_Os07g08330.1	-3.34
LOC_Os07g08340	Os.9225.1.S1_at	-0.14	LOC_Os07g08340.1	-2.1
LOC_Os07g08660	Os.4726.1.S1_at	-1.05	LOC_Os07g08660.1	-1.15
LOC_Os07g09060	Os.1984.1.S1_at	1.01	LOC_Os07g09060.1	-0.39
LOC_Os07g10150	Os.7984.1.S1_at	-0.08	LOC_Os07g10150.1	-3.88
LOC_Os07g10250	Os.25626.1.S1_at	-0.03	LOC_Os07g10250.1	-3.55
LOC_Os07g10570	Os.11099.2.S1_x_at	4.67	LOC_Os07g10570.1	5.98
LOC_Os07g10580	Os.8177.1.S1_a_at	2.97	LOC_Os07g10580.1	5.29
LOC_Os07g10830	Os.10561.1.S1_at	-0.61	LOC_Os07g10830.1	-5.06
LOC_Os07g11330	Os.8224.1.S1_at	5.03	LOC_Os07g11330.1	4.68
LOC_Os07g11360	Os.12884.1.S1_at	6.72	LOC_Os07g11360.1	5.27
LOC_Os07g11410	Os.7449.2.S1_x_at	7.63	LOC_Os07g11410.1	6.19
LOC_Os07g28480	Os.52854.1.S1_at	0.64	LOC_Os07g28480.1	-4.89
LOC_Os07g30970	Os.146.1.S1_at	-0.3	LOC_Os07g30970.1	0.92
LOC_Os07g33240	Os.13599.1.S1_at	-0.28	LOC_Os07g33240.1	-2.16
LOC_Os07g34520	Os.22277.1.S1_at	2.79	LOC_Os07g34520.1	4.79
LOC_Os07g36190	Os.2357.1.S1_at	-1	LOC_Os07g36190.1	-2.71
LOC_Os07g38760	OsAffx.5570.1.S1_at	-0.37	LOC_Os07g38760.1	-3.18
LOC_Os07g38970	Os.38799.1.S1_at	0.04	LOC_Os07g38970.1	-1.57
LOC_Os07g39870	Os.7009.1.S1_at	-0.74	LOC_Os07g39870.1	-2.03
LOC_Os07g42300	Os.12835.2.S1_a_at	-1.28	LOC_Os07g42300.1	-1.92
LOC_Os07g42490	Os.9860.1.S1_at	-0.159454	LOC_Os07g42490.1	8.8
LOC_Os07g42600	Os.37629.1.S1_at	-0.25	LOC_Os07g42600.1	-0.69
LOC_Os07g42950	Os.8316.1.S1_at	-1.18	LOC_Os07g42950.1	-1.99
LOC_Os07g43390	Os.18573.1.S1_at	-1.85	LOC_Os07g43390.1	-4.93
LOC_Os07g44410	Os.15471.1.S1_at	1.5	LOC_Os07g44410.1	-3.82
LOC_Os07g44430	Os.13972.1.S1_at	-0.02	LOC_Os07g44430.1	-3.03
LOC_Os07g44660	Os.16887.1.S1_at	-0.41	LOC_Os07g44660.1	-0.48
LOC_Os07g46370	Os.6412.1.S1_at	-0.64	LOC_Os07g46370.1	-2.88
LOC_Os07g46750	Os.138.1.S1_at	-0.39	LOC_Os07g46750.1	-1.14
LOC_Os07g46990	Os.4169.1.S1_at	0.37	LOC_Os07g46990.1	-2.03
LOC_Os08g02120	Os.12780.1.S1_at	-0.46693	LOC_Os08g02120.1	0.82
LOC_Os08g02400	OsAffx.16790.1.S1_s_at	-0.81	LOC_Os08g02400.1	0.27
LOC_Os08g02420	Os.8701.1.S1_at	1.04	LOC_Os08g02420.1	0.36
LOC_Os08g03290	Os.12168.2.S1_s_at	-0.13	LOC_Os08g03290.1	-3.78
LOC_Os08g03410	Os.12816.1.S1_at	0.91	LOC_Os08g03410.1	-5.72
LOC_Os08g03520	Os.54054.1.S1_x_at	-1.21	LOC_Os08g03520.1	-4.61
LOC_Os08g03640	Os.12290.1.S1_at	-1.57	LOC_Os08g03640.1	1.37
LOC_Os08g03690	Os.16607.1.S1_at	-0.14	LOC_Os08g03690.1	-2.47
LOC_Os08g04460	Os.9162.1.S1_at	1.13	LOC_Os08g04460.1	-2.13
LOC_Os08g05830	Os.40427.1.A1_s_at	0.6	LOC_Os08g05830.1	-5.29
LOC_Os08g06020	Os.22692.1.S1_at	0.15	LOC_Os08g06020.1	-1.11
LOC_Os08g08840	Os.4078.1.S1_at	0.48	LOC_Os08g08840.1	-1.12
LOC_Os08g08960	Os.1853.1.S1_at	1.46	LOC_Os08g08960.1	-3.45
LOC_Os08g09200	Os.10193.1.S1_at	-0.21	LOC_Os08g09200.1	-2.99
LOC_Os08g09250	Os.7835.1.S1_a_at	0.42	LOC_Os08g09250.2	-3.24
LOC_Os08g10570	Os.15538.1.S1_at	-0.58	LOC_Os08g10570.1	-3.61
LOC_Os08g13690	Os.4880.1.S1_at	-0.74	LOC_Os08g13690.1	-1.76
LOC_Os08g18110	Os.9545.1.S1_at	-0.1	LOC_Os08g18110.1	-5.66
LOC_Os08g23150	Os.17629.1.A1_at	1.26	LOC_Os08g23150.1	1.25
LOC_Os08g23180	Os.5500.1.S1_s_at	-0.24	LOC_Os08g23180.1	-3.26
LOC_Os08g23360	Os.52031.1.S1_at	-0.79	LOC_Os08g23360.1	-2.64
LOC_Os08g23710	Os.4696.1.S1_at	-1.47	LOC_Os08g23710.1	-2.39
LOC_Os08g30060	Os.10450.1.S1_at	-0.84	LOC_Os08g30060.1	-1.04
LOC_Os08g32870	Os.15306.1.S1_a_at	0.17	LOC_Os08g32870.1	-3.34
LOC_Os08g33370	Os.6323.2.S1_a_at	0.01	LOC_Os08g33370.1	-2.58
LOC_Os08g36150	Os.8027.1.S1_at	-0.56	LOC_Os08g36150.1	-3.9
LOC_Os08g37320	Os.10781.1.S1_at	0.05	LOC_Os08g37320.1	-1.6
LOC_Os08g37490	Os.18498.1.S1_at	-0.66	LOC_Os08g37490.1	-5.35
LOC_Os08g40790	Os.9471.1.S1_a_at	0.03	LOC_Os08g40790.1	-1.43
LOC_Os08g41300	OsAffx.27508.111.S1_s_at	-0.95	LOC_Os08g41300.1	-3.97
LOC_Os08g41990	Os.10144.1.S1_at	-0.45	LOC_Os08g41990.1	-2.43
LOC_Os08g42560	Os.11790.1.S1_at	-0.56	LOC_Os08g42560.1	-0.77
LOC_Os08g42980	Os.27706.1.S1_at	-0.07	LOC_Os08g42980.1	0.04
LOC_Os08g43190	Os.10128.1.S1_at	2	LOC_Os08g43190.1	2.8
LOC_Os08g43540	Os.7903.1.S1_at	-0.57	LOC_Os08g43540.1	-3.27
LOC_Os08g44530	Os.20530.1.S1_at	-0.33	LOC_Os08g44530.1	-2.59
LOC_Os08g44770	Os.5522.1.S1_at	-0.9	LOC_Os08g44770.1	-5.08
LOC_Os08g44860	Os.12607.1.S1_s_at	0.33	LOC_Os08g44860.2	-1.92
LOC_Os09g02700	Os.38226.1.S1_at	-0.81	LOC_Os09g02700.1	-0.93
LOC_Os09g07510	Os.1308.1.S1_at	0.35	LOC_Os09g07510.1	-3.26
LOC_Os09g07830	Os.12579.1.S1_at	-0.3	LOC_Os09g07830.1	-3.08
LOC_Os09g08430	Os.9941.1.S1_at	-1.12	LOC_Os09g08430.1	-1.12
LOC_Os09g08910	OsAffx.26050.4.S1_at	-0.295754	LOC_Os09g08910.1	-2.92
LOC_Os09g10600	Os.27167.1.S1_at	-0.28	LOC_Os09g10600.1	0.47
LOC_Os09g12660	Os.3122.1.S1_at	-0.93	LOC_Os09g12660.1	-0.34
LOC_Os09g15520	Os.6617.1.S1_s_at	0.14	LOC_Os09g15520.1	-4.17
LOC_Os09g17730	Os.10309.1.S1_at	-0.74	LOC_Os09g17730.1	1.08
LOC_Os09g21110	Os.24539.1.S1_at	-1.12	LOC_Os09g21110.1	0.94
LOC_Os09g26730	Os.9366.1.S1_at	-0.63	LOC_Os09g26730.1	-1.27
LOC_Os09g26880	Os.7932.1.S1_at	0.92	LOC_Os09g26880.1	-1.78
LOC_Os09g27420	Os.14842.1.S1_at	0.39	LOC_Os09g27420.1	2.09
LOC_Os09g27830	Os.6625.1.S1_x_at	-0.83	LOC_Os09g27830.1	0.85
LOC_Os09g29840	Os.21292.1.S1_at	-0.47	LOC_Os09g29840.1	0.53
LOC_Os09g30418	Os.28300.2.S2_a_at	-1.2	LOC_Os09g30418.1	0.28
LOC_Os09g32500	Os.13485.1.S1_at	-1.2	LOC_Os09g32500.1	-2.22
LOC_Os09g32650	Os.51218.1.S1_at	-1.37	LOC_Os09g32650.1	-1.95
LOC_Os09g32800	Os.3736.1.S1_at	-0.26	LOC_Os09g32800.1	-5.58
LOC_Os09g33810	Os.12712.1.S1_at	-0.13	LOC_Os09g33810.1	-0.17
LOC_Os09g35730	Os.7783.1.S1_at	0.81	LOC_Os09g35730.1	-1.85
LOC_Os09g35970	Os.17852.1.S1_at	-0.53	LOC_Os09g35970.1	-3.22
LOC_Os09g36800	Os.12414.1.S1_at	-0.06	LOC_Os09g36800.1	0.31
LOC_Os09g38030	Os.10118.1.S1_at	0.46	LOC_Os09g38030.1	-0.51
LOC_Os09g39380	Os.6239.1.S1_at	0.34	LOC_Os09g39380.1	-2.42
LOC_Os09g39550	Os.4188.1.S1_at	-0.06	LOC_Os09g39550.1	-3.28
LOC_Os10g06720	Os.7272.1.S1_at	-1.65	LOC_Os10g06720.1	-3.97
LOC_Os10g10244	Os.11722.1.S1_a_at	-0.33	LOC_Os10g10244.1	-3.32
LOC_Os10g11140	Os.5319.1.S1_at	-1.07	LOC_Os10g11140.1	-0.66
LOC_Os10g11810	Os.7543.1.S1_at	0.57	LOC_Os10g11810.1	-1.45
LOC_Os10g26060	Os.12807.1.S1_x_at	5.53	LOC_Os10g26060.1	3.69
LOC_Os10g27174	Os.9876.1.S1_at	-0.57	LOC_Os10g27174.1	-2.32
LOC_Os10g27190	Os.12292.1.S1_at	-0.31	LOC_Os10g27190.1	-4.59
LOC_Os10g28120	Os.27875.1.S1_at	2.85	LOC_Os10g28120.1	0.07
LOC_Os10g30150	Os.5338.1.S1_at	-1.28	LOC_Os10g30150.1	-7.22
LOC_Os10g30580	Os.10607.1.S1_at	-0.03	LOC_Os10g30580.1	-3.89
LOC_Os10g31950	Os.12690.1.S1_at	-0.2	LOC_Os10g31950.1	0.22
LOC_Os10g32550	Os.10551.1.S1_at	-0.72	LOC_Os10g32550.1	-1.71
LOC_Os10g32680	Os.17506.1.S1_at	1.56	LOC_Os10g32680.1	1.68
LOC_Os10g33800	Os.12171.1.S1_at	0.36	LOC_Os10g33800.1	-1.11
LOC_Os10g35050	Os.2544.1.S1_s_at	0.79	LOC_Os10g35050.1	-1.91
LOC_Os10g35870	Os.4609.1.S1_a_at	0.15	LOC_Os10g35870.1	-0.62
LOC_Os10g36650	Os.19742.1.S1_at	3.12	LOC_Os10g36650.1	2.12
LOC_Os10g38489	Os.7794.1.S1_at	2.5	LOC_Os10g38489.1	-1.68
LOC_Os10g41410	Os.2715.1.S1_at	-1.07	LOC_Os10g41410.2	-1.39
LOC_Os10g41960	Os.37950.1.S1_at	-0.67	LOC_Os10g41960.1	-1.17
LOC_Os10g42100	Os.12158.1.S1_at	-1.2	LOC_Os10g42100.1	-1.26
LOC_Os11g01300	OsAffx.30763.1.S1_s_at	0	LOC_Os11g01300.1	-0.07
LOC_Os11g06390	Os.9627.1.S1_at	-1.45	LOC_Os11g06390.1	-4.22
LOC_Os11g06750	Os.22696.1.S1_at	-1.02	LOC_Os11g06750.1	-2.84
LOC_Os11g06760	Os.12174.1.S1_at	0.34	LOC_Os11g06760.1	-0.11
LOC_Os11g07280	Os.11596.1.S2_at	-0.53	LOC_Os11g07280.1	-4.59
LOC_Os11g09280	Os.10985.1.S1_at	-0.24	LOC_Os11g09280.1	-0.29
LOC_Os11g11390	Os.10134.1.S1_at	-0.77	LOC_Os11g11390.1	-0.66
LOC_Os11g20790	Os.7990.1.S1_at	-0.44	LOC_Os11g20790.1	-3.12
LOC_Os11g21990	Os.6860.1.S1_at	-0.73	LOC_Os11g21990.1	-3.56
LOC_Os11g24560	Os.6807.1.S1_at	0.33	LOC_Os11g24560.1	-1.96
LOC_Os11g26570	OsAffx.31140.1.S1_at	0.1	LOC_Os11g26570.1	-2.98
LOC_Os11g26850	Os.8240.1.S1_at	-1.26	LOC_Os11g26850.2	-1.57
LOC_Os11g26860	Os.10151.1.S1_at	0.0306563	LOC_Os11g26860.1	-3.55
LOC_Os11g29400	Os.15877.1.S1_at	-0.29	LOC_Os11g29400.1	-2.19
LOC_Os11g32260	Os.9797.1.S1_at	-0.35	LOC_Os11g32260.1	-5.87
LOC_Os11g34350	Os.11992.1.S1_at	-0.52	LOC_Os11g34350.1	-1.06
LOC_Os11g34450	Os.9221.1.S1_at	-0.72	LOC_Os11g34450.1	-6
LOC_Os11g37270	Os.8470.1.S1_at	0.48	LOC_Os11g37270.1	-4.39
LOC_Os11g40140	Os.3705.1.S1_at	-0.34	LOC_Os11g40140.1	-3.23
LOC_Os11g40530	Os.9671.1.S1_at	1.66	LOC_Os11g40530.1	3.44
LOC_Os12g01260	Os.12962.1.S1_at	-0.21	LOC_Os12g01260.1	-1.89
LOC_Os12g07820	Os.9266.1.S1_at	-0.54	LOC_Os12g07820.1	-1.29
LOC_Os12g08170	Os.48783.1.S1_at	-0.2	LOC_Os12g08170.1	-2.34
LOC_Os12g08280	Os.37640.1.S1_at	-0.04	LOC_Os12g08280.1	-0.88
LOC_Os12g12850	Os.4859.1.S1_at	0.99	LOC_Os12g12850.1	2.36
LOC_Os12g13320	Os.11405.1.S1_at	0.18	LOC_Os12g13320.1	1.24
LOC_Os12g13380	Os.134.1.S1_at	0.66	LOC_Os12g13380.1	-0.87
LOC_Os12g13390	Os.16710.1.S1_at	-0.62	LOC_Os12g13390.1	-4.91
LOC_Os12g14070	Os.7977.1.S1_at	2.36	LOC_Os12g14070.1	7.93
LOC_Os12g17910	Os.8007.1.S1_at	-0.19	LOC_Os12g17910.1	-4.19
LOC_Os12g21798	Os.4690.1.S1_at	-0.82	LOC_Os12g21798.1	-3.04
LOC_Os12g22030	Os.16318.1.S1_at	-0.38	LOC_Os12g22030.1	-1.09
LOC_Os12g25710	Os.6059.1.S1_at	-0.42	LOC_Os12g25710.1	2.64
LOC_Os12g27830	Os.38999.1.S1_at	0.16	LOC_Os12g27830.1	-6.13
LOC_Os12g29400	Os.11305.1.S1_at	0.45	LOC_Os12g29400.1	-8.02
LOC_Os12g36194	Os.5218.1.S1_at	0.48	LOC_Os12g36194.1	-0.71
LOC_Os12g37870	Os.6425.1.S1_at	0.13	LOC_Os12g37870.1	2.09
LOC_Os12g37960	Os.21433.1.S1_at	-0.34	LOC_Os12g37960.1	0.97
LOC_Os12g38000	Os.11297.1.S1_at	-0.95	LOC_Os12g38000.1	-0.81
LOC_Os12g41390	Os.6156.1.S1_a_at	-0.09	LOC_Os12g41390.1	-1.18
LOC_Os12g43630	Os.4155.1.S1_at	0.82	LOC_Os12g43630.1	-0.81
